# Supplementary material for: Co-expression of peripheral olfactory receptors with SARS-CoV-2 infection mediators: Potential implications beyond loss of smell as a COVID-19 symptom
Source: PubMed Central journal article supplement — Int J Mol Med. 2020 Jun 17;46(3):949–56. doi: 10.3892/ijmm.2020.4646 (PMC7388840; doi:10.3892/ijmm.2020.4646), 2020-06-17

Figure S1. Detailed methylation analyses of the pan-cancer methylation status of data sets from The Cancer Genome Atlas (TCGA) using the Shiny Methylation Analysis Resource Tool (SMART).  $\beta$ -values for olfactory receptors (ORs) show median, cancer (red) and normal (grey), data sets between 0.5-0.9. A high range (0.1-0.9) of  $\beta$ -values between individual samples, represented by the scatter; OR1J4 stands out as having  $\beta$ -values lower than 0.5; OR2A1, OR10Q1 and OR4M1 exhibit the highest level (median  $\beta$ -value 0.75) of tumour and normal methylation. Significant change in methylation indicated as: \* $P < 0.05$ ; \*\* $P < 0.01$ ; \*\*\* $P < 0.001$ ; \*\*\*\* $P < 0.0001$ , while non-significant change as: N/S:  $P > 0.05$ . It must be noted that control data are absent for: AAC, DLBC, KICH, OV, MESO, USC and UVM.

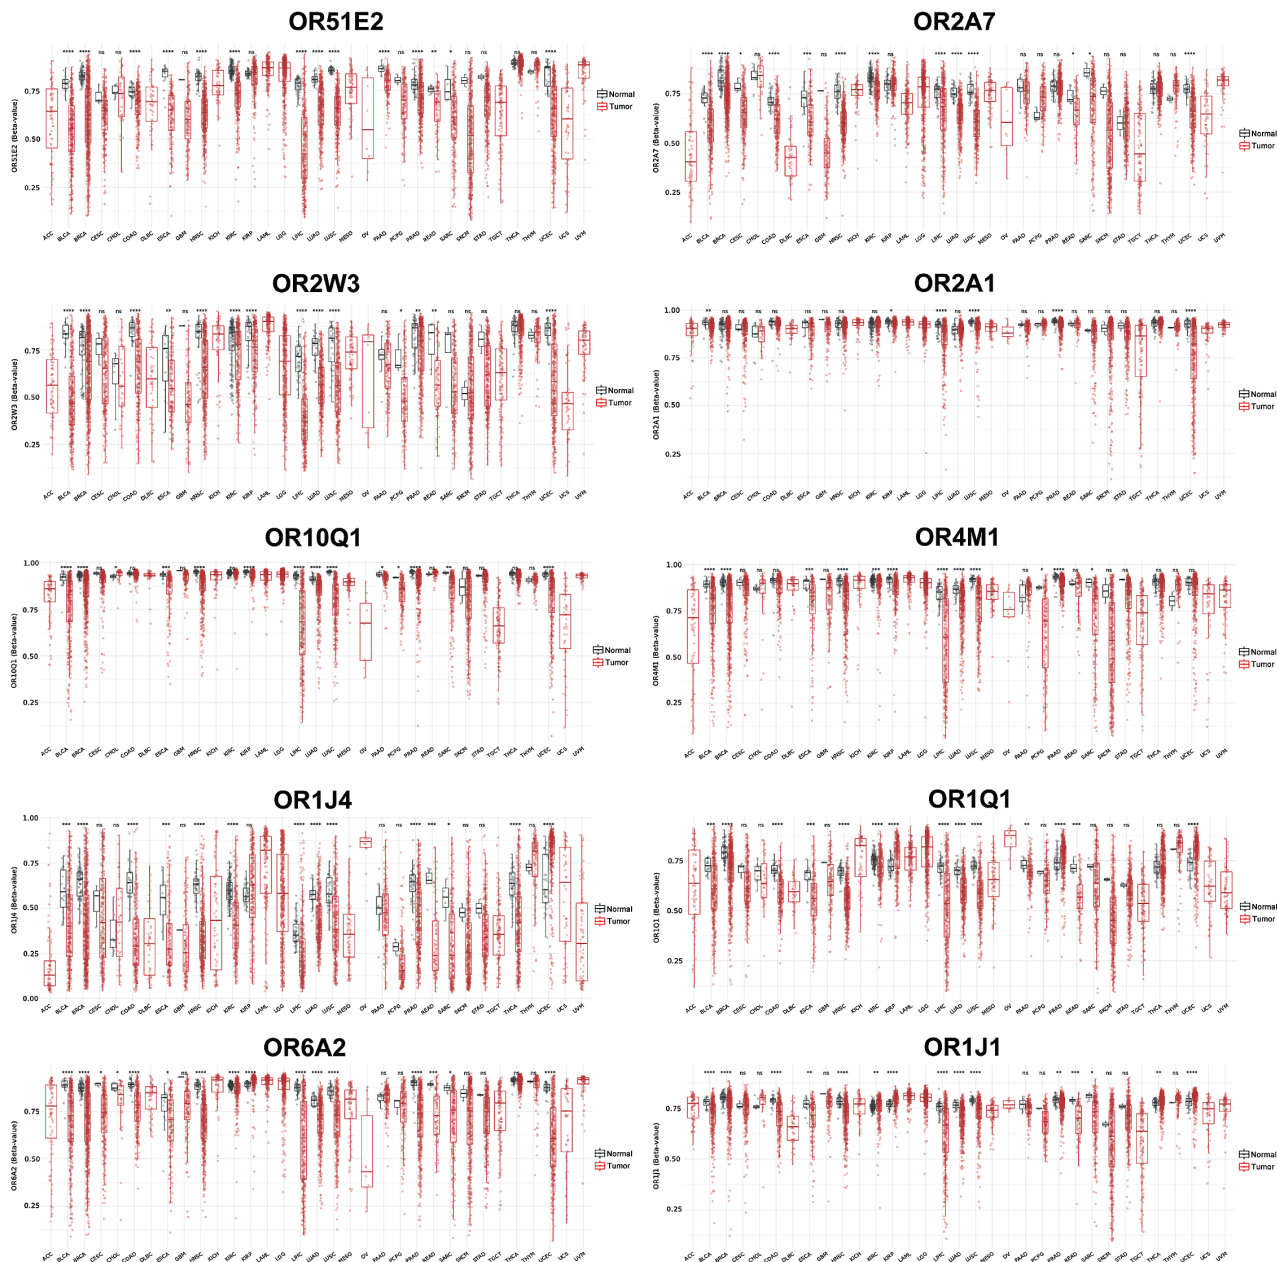

Figure S2. Pan-cancer distribution of olfactory receptor (OR) mutation types from RNAseq data (cBioportal). OR2A7, OR2W3 and OR2A1 exhibit a high distribution of amplification/gain of function throughout the range of tumour groups (red); OR51E2, OR10Q1, OR1J4, OR1Q1, OR6A2 and OR1J1 primarily exhibit mutations in the form of shallow deletions (blue) across the range of tumours; OR4M1 presents with limited sample size, expressing a range of shallow deletions and amplification across the data set.

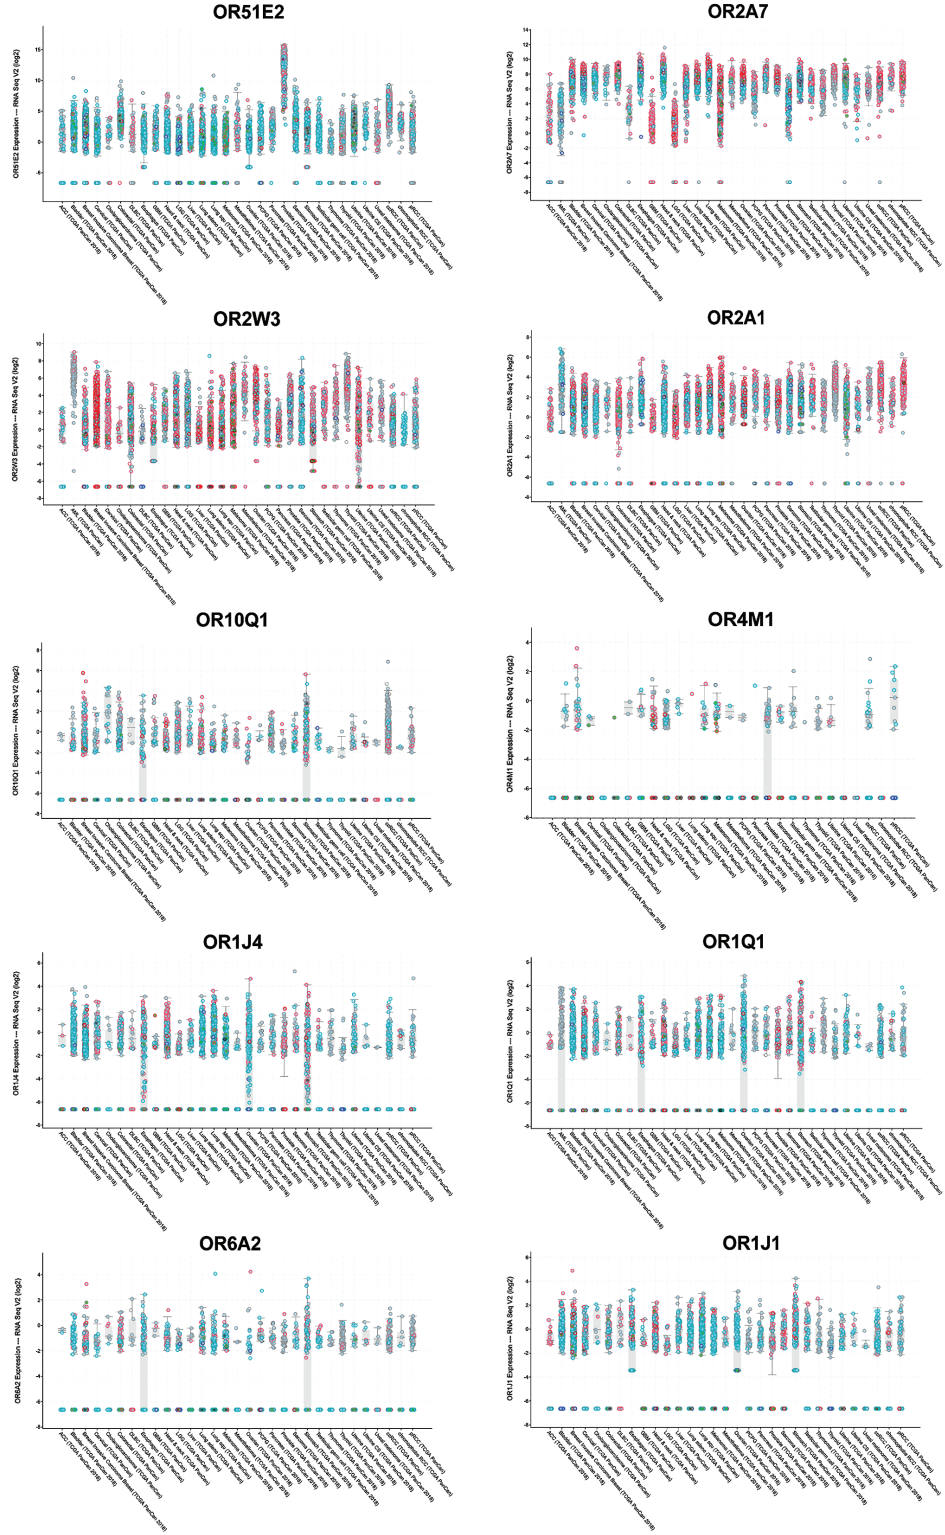

Supplement: Supplementary_Data.pdf [file Supplementary_Data.pdf]
